# Supplementary material for: Use of lipid-lowering therapy after ischaemic stroke and expected benefit from intensification of treatment
Source: PubMed Central journal article supplement — Open Heart. 2022 Apr 22;9(1):e001972. doi: 10.1136/openhrt-2022-001972 (PMC9036470; doi:10.1136/openhrt-2022-001972), 2022-04-22

## Inclusion criteria

Home-dwelling patients with ischemic stroke  
(n=462): 45 to 80 years  
Five stroke units in Norway  
Follow-up after 3 and 18 months

## Study design

Observational multicenter study with  
consecutively inclusion between 2015 and 2017

## Research questions

- 1) How do current prescription patterns for lipid-lowering therapy (LLT) and achieved LDL-C reduction differ in subgroups of stroke patients?
- 2) What is the expected treatment benefit when theoretically up-titrating LLT according to guidelines?

## Methods

Logistic and linear regression analyses  
The SMART-REACH model combined with  
relative effect estimates from clinical trials

## Summary and conclusion

Potential for optimization of conventional LLT  
use exists. Awareness of groups at risk of  
undertreatment and objective estimates of  
benefit may yield personalized treatment  
decisions and reduce residual cholesterol risk

## Use of lipid-lowering therapy after ischemic stroke and expected benefit from intensification of treatment

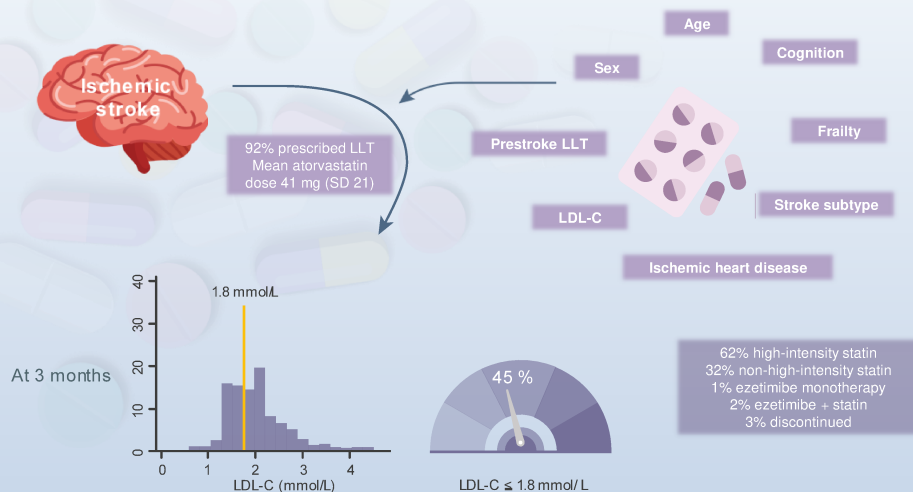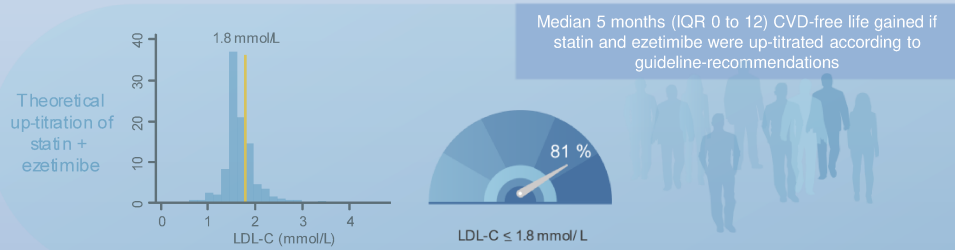

Supplement: openhrt-2022-001972supp002.pdf [file openhrt-2022-001972supp002.pdf]
